# Supplementary material for: Magnetic Resonance Imaging Used to Define the Optimum Needle Length in Pigs of Different Ages
Source: Animals (Basel). 2022 Jul 29;12(15):1936. doi: 10.3390/ani12151936 (PMC9367419; doi:10.3390/ani12151936)

## Supplementary material:

Table 3S: Mean values including standard deviations for the optimum injection point (OI) and the length to the middle of the neck (MN) at first (\_1) and second (\_2) measurement point, divided into the four defined age groups and separated to sex with mean age and weight.

| Age group [d]     | sex    | n   | Mean age [d]    | Mean weight [kg] | MN_1 [mm]<br>Mean $\pm$ SD | OI_1 [mm]<br>Mean $\pm$ SD | MN_2 [mm]<br>Mean $\pm$ SD | OI_2 [mm]<br>Mean $\pm$ SD |
|-------------------|--------|-----|-----------------|------------------|----------------------------|----------------------------|----------------------------|----------------------------|
| < 29<br>(n=62)    | male   | 29  | 22.7 $\pm$ 5.2  | 7.2 $\pm$ 1.9    | 35.7 $\pm$ 4.6             | 12.4 $\pm$ 2.7             | 38.4 $\pm$ 4.6             | 13.8 $\pm$ 3.2             |
|                   | female | 33  | 20.7 $\pm$ 6.4  | 6.8 $\pm$ 2.1    | 35.7 $\pm$ 4.5             | 12.6 $\pm$ 4.0             | 37.0 $\pm$ 4.4             | 13.6 $\pm$ 2.3             |
| 29-70<br>(n=307)  | male   | 158 | 50.1 $\pm$ 11.0 | 12.8 $\pm$ 4.0   | 36.7 $\pm$ 4.6             | 14.5 $\pm$ 3.5             | 37.6 $\pm$ 4.3             | 14.3 $\pm$ 3.3             |
|                   | female | 149 | 50.6 $\pm$ 11.2 | 13.3 $\pm$ 4.2   | 37.1 $\pm$ 4.7             | 15.0 $\pm$ 3.7             | 37.8 $\pm$ 4.6             | 14.1 $\pm$ 3.1             |
| 71-117<br>(n=219) | male   | 203 | 95.6 $\pm$ 11.8 | 33.9 $\pm$ 7.3   | 52.6 $\pm$ 6.1             | 22.3 $\pm$ 4.3             | 54.4 $\pm$ 6.2             | 21.1 $\pm$ 5.1             |
|                   | female | 14  | 74.1 $\pm$ 2.5  | 20.7 $\pm$ 4.1   | 42.2 $\pm$ 3.3             | 20.3 $\pm$ 5.9             | 42.6 $\pm$ 3.8             | 19.0 $\pm$ 5.1             |
| > 170<br>(n=142)  | male   | 0   |                 |                  |                            |                            |                            |                            |
|                   | female | 142 | 179.3 $\pm$ 7.0 | 87.9 $\pm$ 11.7  | 74.3 $\pm$ 5.3             | 30.9 $\pm$ 7.0             | 77.6 $\pm$ 4.9             | 29.2 $\pm$ 7.3             |

## Supplementary material:

Figure S1: Multiple regressions showing the accuracy of using age [d] and weight [kg] to estimate the depth of the optimum injection site 10.55 mm (OI\_1; Fig. 2a) and 20.39 mm (OI\_2; Fig. 2b) behind the base of the ear. Multiple regression showing the accuracy of using age [d] and weight [kg] to estimate the depth to the spine 10.55 mm (spine\_1; Fig. 2c) and 20.39 mm (spine\_2; Fig. 2d) behind the base of the ear.

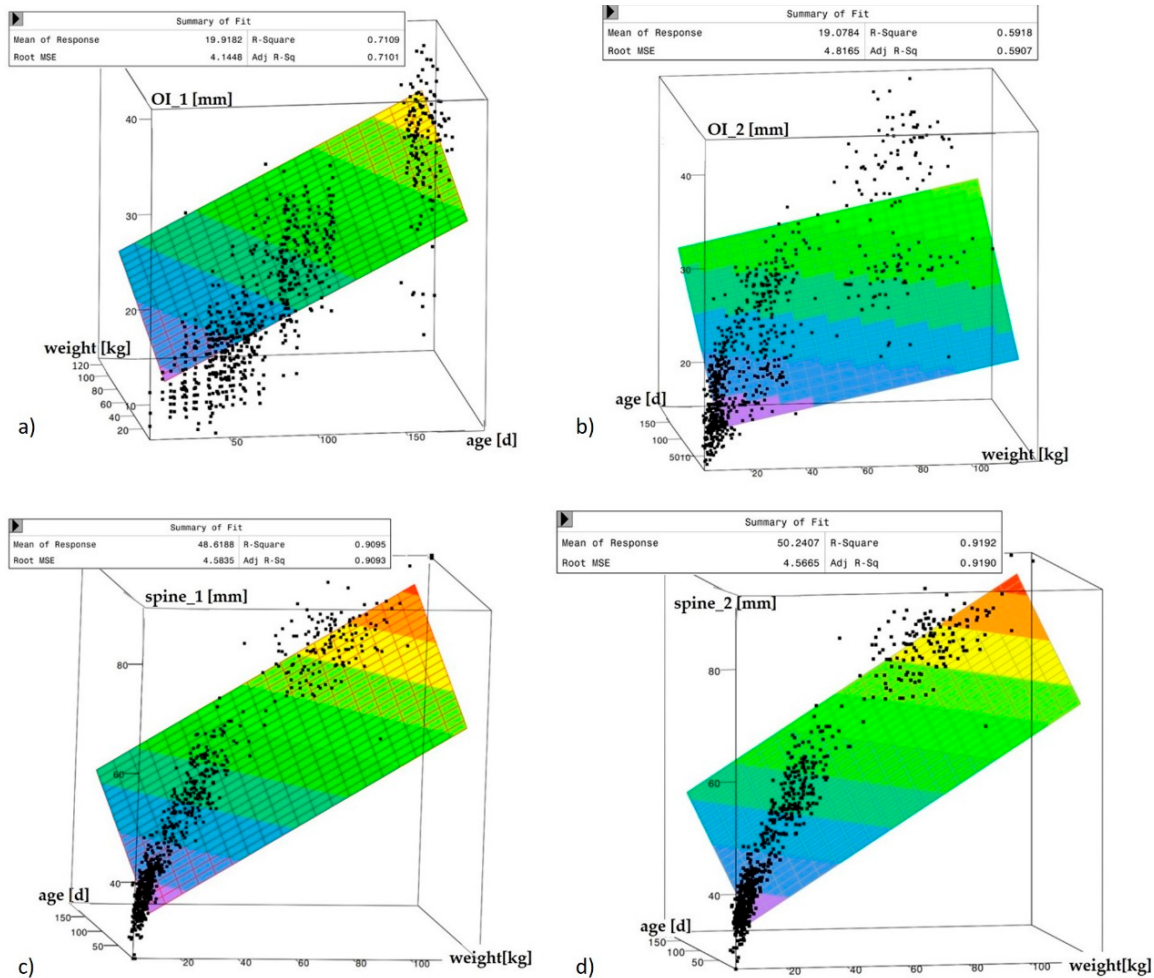

Supplement: Supplementary file 1 [file animals-12-01936-s001.zip › animals-1816140-supplementary.pdf]
